# Supplementary material for: Revisiting the hydrothermal synthesis of titanate nanotubes: new insights on the key factors affecting the morphology
Source: Royal Society of Chemistry journal article supplement (doi:10.1039/c1nr10081e), 2011-01-01

## Supporting Information

**Table 1.** Preparation conditions and products reported in the literature.

| Ref. | TiO <sub>2</sub> precursor <sup>a</sup>        | TiO <sub>2</sub> /NaOH ratio (g/L) | Synthesis conditions         | Washing agent                                     | Parameters controlled <sup>b</sup>                                       | Stage of NT formation |
|------|------------------------------------------------|------------------------------------|------------------------------|---------------------------------------------------|--------------------------------------------------------------------------|-----------------------|
| [4]  | R (20nm)                                       | 125                                | 10M NaOH<br>20h 110°C        | H <sub>2</sub> O + 0.1M HCl                       | 1 - Electrical conductivity (Na <sup>+</sup> )                           | Washing               |
| [6]  | ? (5nm)                                        | 12.5                               | 10M NaOH<br>>48h 100-180°C   | H <sub>2</sub> O + alcohol or acetone             | 1 - T <sub>HT</sub><br>2 - Washing agent<br>3 - T <sub>calcination</sub> | Washing               |
| [7]  | A/R (83% R; 20nm)                              | 5                                  | 10M NaOH<br>Sonication 110°C | 0.1M HNO <sub>3</sub> + H <sub>2</sub> O          | 1 - Sonication parameters                                                | Washing               |
| [8]  | A/R (? nm)                                     | ?                                  | 10M NaOH<br>24-72h 130°C     | 0.1M HCl + H <sub>2</sub> O                       | -                                                                        | HT                    |
| [9]  | R; A/R or A                                    | 2.86                               | 10M NaOH<br>20h 110°C        | H <sub>2</sub> O + HCl or HNO <sub>3</sub>        | 1-TiO <sub>2</sub> Particle size<br>2- TiO <sub>2</sub> phase            | ?                     |
| [10] | A (? nm)                                       | ?                                  | 10M NaOH<br>12h 150°C        | 0.1M HNO <sub>3</sub> + H <sub>2</sub> O          | 1 - t <sub>HT</sub><br>2 - T <sub>HT</sub>                               | HT                    |
| [11] | A/R (Degussa P25)                              | 28.6                               | 10M NaOH<br>24h 110-150°C    | 0.1M HCl                                          | 1 - T <sub>HT</sub><br>2 - T <sub>calcination</sub>                      | Washing               |
| [12] | A (? nm)                                       | 0.83-30                            | 10M NaOH<br>22h 120-190°C    | H <sub>2</sub> O + H <sub>2</sub> SO <sub>4</sub> | 1 - T <sub>HT</sub><br>2 - TiO <sub>2</sub> /NaOH                        | HT                    |
| [13] | A/R (Degussa P25)                              | 28.6                               | 10M NaOH<br>24h 130°C        | HCl                                               | 1 - M <sub>HCl</sub> (pH)                                                | Washing               |
| [14] | Amorphous                                      | 5                                  | 10M NaOH<br>130-180°C        | H <sub>2</sub> O                                  | 1 - T <sub>HT</sub><br>2 - t <sub>HT</sub>                               | HT                    |
| [15] | A (bulk)                                       | 10                                 | 10M NaOH<br>48h 120°C        | 0.1M HCl or H <sub>2</sub> O                      | 1 -Washing agent<br>2 - T <sub>calc.</sub>                               | HT                    |
| [16] | A (8 or 220 nm)                                | 60                                 | 10-20M NaOH<br>15-30h 120°C  | 0.1M HCl + H <sub>2</sub> O                       | 1 - crystal size<br>2 - M <sub>NaOH</sub><br>3 - pH HCl                  | HT                    |
| [17] | A (? nm)                                       | ?                                  | 10M NaOH<br>48h 150°C        | H <sub>2</sub> O or 0.1M HCl + H <sub>2</sub> O   | 1 - Washing process (Na <sup>+</sup> )<br>2 - T <sub>calcination</sub>   | HT                    |
| [18] | A/R (Degussa P25)                              | ?                                  | 5-10M NaOH<br>20h 100-220°C  | ?                                                 | 1 - T <sub>HT</sub><br>2 - M <sub>NaOH</sub>                             | ?                     |
| [19] | A/R (Degussa P25);<br>A (15nm);<br>R (10x40nm) | ?                                  | 10M NaOH<br>24h 120°C        | 0.1M HCl + H <sub>2</sub> O                       | 1- TiO <sub>2</sub> phase                                                | ?                     |
| [20] | A/R (Degussa P25)                              | 20                                 | 10M NaOH<br>24h 130°C        | 2M HCl + H <sub>2</sub> O                         | -                                                                        | Washing               |
| [21] | A/R (Degussa P25)                              | ?                                  | 10M NaOH<br>24h 130°C        | H <sub>2</sub> O or H <sub>2</sub> O + 0.1M HCl   | 1 -Washing process(Na <sup>+</sup> )<br>2 - T <sub>calc</sub>            | ?                     |
| [22] | A (? nm)                                       | 8                                  | NaOH + KOH<br>106°C 4 days   | H <sub>2</sub> O + H <sub>2</sub> O               | 1 - Ion exchange<br>2 - T <sub>calc</sub>                                | NaOH/KOH              |

<sup>a</sup> (A) Anatase; (A/R) Anatase + Rutile; (R) Rutile.

<sup>b</sup> T<sub>HT</sub>: temperature of hidrothermal treatment; t<sub>HT</sub>: duration of the treatment.

**Figure 1.**

Raman spectra of sample TNT3, before and after the washing stage. The spectrum of anatase is also plotted for comparison.

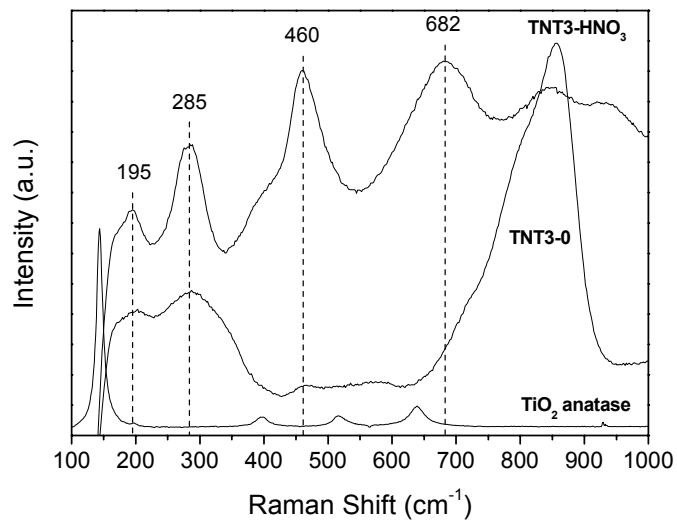

**Figure 2.**

TEM micrographs of TNT1-0 before (a) and after (b) exposure to electron beam for 30 seconds. The degraded region (circled) was Ti free.

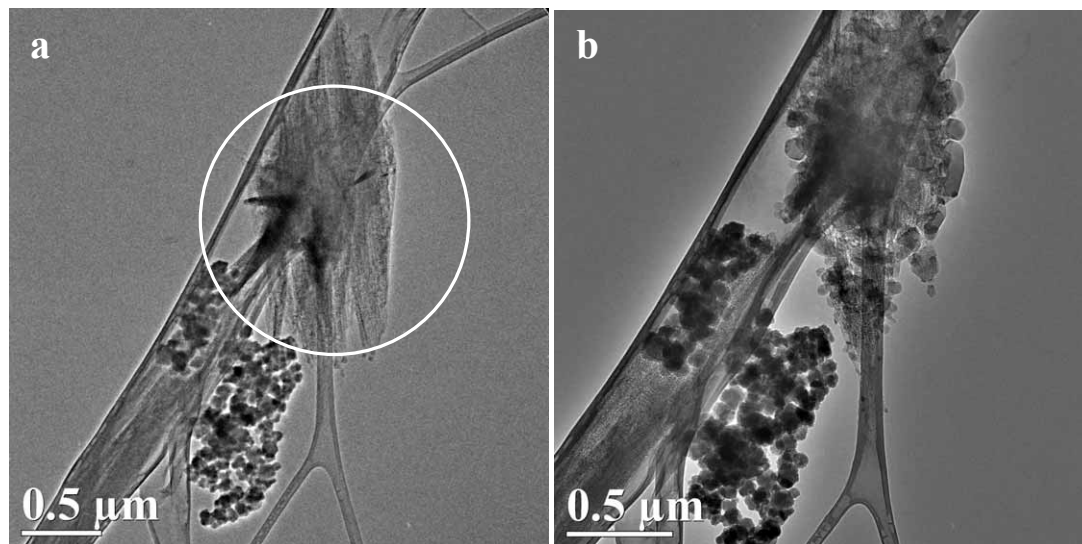

**Figure 3.**  
Pore size distributions of nanotubes synthesized from different precursors.

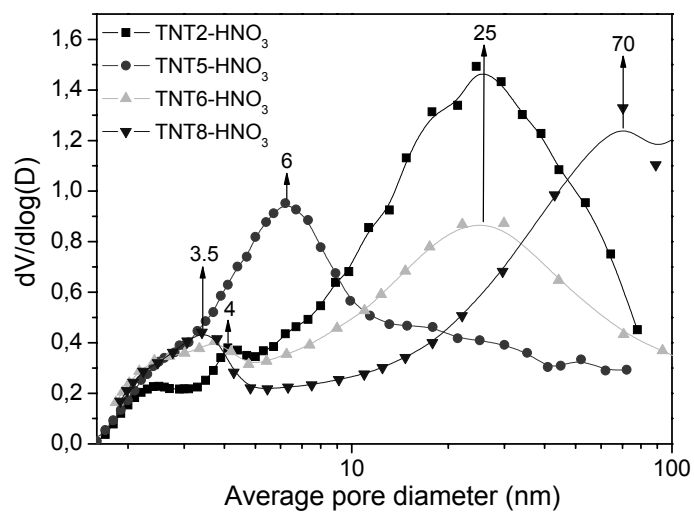

Supplement: c1nr10081e.pdf [file c1nr10081e.pdf]
